# Supplementary material for: Cost-Effectiveness of Positive Memory Training (PoMeT) for the Treatment of Depression in Schizophrenia
Source: MDPI journal article supplement (doi:10.3390/ijerph191911985), 2022-09-22
Supplement: s1 [file s1]

## Supplementary material

**Supplementary Table S1:** Resource use categories and their unit costs (in £, for year 2016).

| Resource use                               | Unit cost (£) | Unit                                                 | Source of estimate |
|--------------------------------------------|---------------|------------------------------------------------------|--------------------|
| <b>Primary care</b>                        |               |                                                      |                    |
| GP                                         | 14.60-86.00   | per telephone contact, visit or home visit           | [20]               |
| Practice nurse (at GP clinic)              | 7.90-38.00    | per telephone contact, visit or home visit           | [20]               |
| <b>Non-mental health community care</b>    |               |                                                      |                    |
| Community district nurse (CDN)             | 16.16-106.10  | per telephone contact, visit or home visit           | [20]               |
| Occupational therapy                       | 12.47-38.13   | per telephone contact, visit or home visit           | [20]               |
| Physiotherapy                              | 23.05-61.18   | per telephone contact, visit or home visit           | [20]               |
| Emergency service (ambulance)              | 7.00-236.00   | per telephone contact, treat & refer, treat & convey | [20]               |
| <b>Mental health community care</b>        |               |                                                      |                    |
| Psychiatrist                               | 17.70-37.57   | per telephone contact, visit or home visit           | [21]               |
| Psychologist                               | 61.22-130.00  | per telephone contact, visit or home visit           | [21]               |
| Psychiatric nurse                          | 5.20-40.08    | per telephone contact, visit or home visit           | [20]               |
| PoMeT (intervention)                       | 86.00         | per contact                                          | [20]               |
| Drug/alcohol service worker                | 19.50-54.00   | per telephone contact, visit or home visit           | [20]               |
| Drop-in centre (including street agencies) | 34.00         | per contact                                          | [20]               |
| Self-help/support group                    | 58.40         | per contact                                          | [21]               |
| <b>Mental health outpatient care</b>       |               |                                                      |                    |
| Psychiatrist                               | 49.49-105.08  | per telephone contact or visit                       | [21]               |
| Psychologist                               | 93.75-199.06  | per telephone contact or visit                       | [21]               |
| <b>Non-mental health outpatient care</b>   |               |                                                      |                    |
| Specific outpatient services               | 3.37-473.72   | per service, procedure, test, or contact             | [21]               |
| <b>Mental health inpatient care</b>        |               |                                                      |                    |
| Psychiatric inpatient general ward         | 420.67        | per bed day                                          | [20]               |
| <b>Non-mental health inpatient care</b>    |               |                                                      |                    |
| Specific inpatient wards                   | 423-1468      | per rehabilitation day, per bed day                  | [22]               |
| <b>Psychiatric medication</b>              |               |                                                      |                    |
| Oral medication                            | Various       | per milligram                                        | [23]               |
| <b>Social care</b>                         |               |                                                      |                    |
| Social worker                              | 27.52-76.20   | per telephone contact, visit or home visit           | [20]               |
| Community Support Worker (unqualified)     | 13.00-36.00   | per telephone contact, visit or home visit           | [20]               |
| Home help/home care worker                 | 4.44-17.33    | per telephone contact, visit or home visit           | [20]               |
| Housing worker                             | 7.13-19.74    | per telephone contact, visit or home visit           | [24]               |
| Voluntary/Charity worker                   | 7.13-19.74    | per telephone contact, visit or home visit           | [24]               |
| <b>Indirect costs</b>                      |               |                                                      |                    |
| Informal care                              | 9.21          | per hour                                             | [24]               |
| Absenteeism                                |               |                                                      |                    |
| Full time worker                           | 128.78        | per day                                              | [24]               |
| Part time worker                           | 86.36         | per day                                              | [24]               |
| Volunteer worker                           | 75.56         | per day                                              | [24]               |

**Supplementary Table S2.** Observed capability well-being outcomes (OXCAP-MH, ICECAP-A).

|                 | <i>n</i> | <b>PoMeT</b><br>mean (SD) | <i>n</i> | <b>TAU</b><br>mean (SD) |
|-----------------|----------|---------------------------|----------|-------------------------|
| <b>OXCAP-MH</b> |          |                           |          |                         |
| M0              | 46       | 55 (12.59)                | 47       | 56 (13.30)              |
| M3              | 45       | 56 (13.65)                | 44       | 56 (17.18)              |
| M6              | 44       | 55 (15.13)                | 44       | 56 (16.09)              |
| M9              | 40       | 56 (16.30)                | 45       | 58 (16.52)              |
| <b>ICECAP-A</b> |          |                           |          |                         |
| M0              | 49       | 0.533 (0.210)             | 48       | 0.515 (0.214)           |
| M3              | 48       | 0.553 (0.198)             | 45       | 0.475 (0.284)           |
| M6              | 44       | 0.556 (0.228)             | 46       | 0.563 (0.258)           |
| M9              | 44       | 0.571 (0.207)             | 45       | 0.558 (0.243)           |

PoMeT: PoMeT Intervention group, TAU: Treatment As Usual group, M: month

**Supplementary Table S3.** Number of psychiatric medications taken, by group and observation period.

|                          | <b>-M3 to M0<br/>mean (SD)</b> | <b>M0 to M3<br/>mean (SD)</b> | <b>M3 to M6<br/>mean (SD)</b> | <b>M6 to M9<br/>mean (SD)</b> | <b>p-value<br/>(before vs. during trial periods)</b> |
|--------------------------|--------------------------------|-------------------------------|-------------------------------|-------------------------------|------------------------------------------------------|
| <b>PoMeT<br/>(n= 48)</b> | 2.50 (1.20)                    | 2.69 (1.13)                   | 2.77 (1.19)                   | 2.85 (1.37)                   | 0.0115*                                              |
| <b>TAU<br/>(n=46)</b>    | 2.36 (1.36)                    | 2.47 (1.43)                   | 2.63 (1.42)                   | 2.67 (1.42)                   | 0.0013*                                              |

PoMeT: PoMeT Intervention group, TAU: Treatment As Usual group, M: month, \*p<0.05

**Supplementary Table S4.** Number of antidepressant medications taken, by group and observation period.

|                           | <b>-M3 to M0<br/>n (%)</b> | <b>M0 to M3<br/>n (%)</b> | <b>M3 to M6<br/>n (%)</b> | <b>M6 to M9<br/>n (%)</b> | <b>p-value<br/>(before trial vs. during trial periods)</b> |
|---------------------------|----------------------------|---------------------------|---------------------------|---------------------------|------------------------------------------------------------|
| <b>PoMeT (n=48)</b>       |                            |                           |                           |                           |                                                            |
| <b>0</b>                  | 17 (35%)                   | 16 (33%)                  | 16 (33%)                  | 16 (33%)                  |                                                            |
| <b>1</b>                  | 27 (56%)                   | 26 (54%)                  | 26 (54%)                  | 26 (54%)                  |                                                            |
| <b>2</b>                  | 4 (8%)                     | 6 (13%)                   | 6 (13%)                   | 6 (13%)                   |                                                            |
| <b>mean (SD)</b>          | 0.73 (0.61)                | 0.79 (0.65)               | 0.79 (0.65)               | 0.79 (0.65)               | 0.0832                                                     |
| <b>TAU (n=46)</b>         |                            |                           |                           |                           |                                                            |
| <b>0</b>                  | 22 (48%)                   | 21 (46%)                  | 20 (43%)                  | 19 (41%)                  |                                                            |
| <b>1</b>                  | 17 (37%)                   | 17 (37%)                  | 18 (39%)                  | 19 (41%)                  |                                                            |
| <b>2</b>                  | 7 (15%)                    | 8 (17%)                   | 8 (17%)                   | 8 (17%)                   |                                                            |
| <b>mean (SD)</b>          | 0.67 (0.73)                | 0.72 (0.75)               | 0.74 (0.74)               | 0.76 (0.74)               | 0.0442*                                                    |
| <b>Full cohort (n=94)</b> |                            |                           |                           |                           |                                                            |
| <b>mean (SD)</b>          | 0.70 (0.67)                | 0.76 (0.70)               | 0.77 (0.70)               | 0.78 (0.69)               | 0.0075*                                                    |

M: month, PoMeT: PoMeT intervention group, TAU: Treatment As Usual group, \*p<0.05

**Supplementary Table S5.** Sensitivity analysis: Cost results adjusted for outliers (in £, for year 2016/17).

| Cost category                                                                    | PoMeT (n=48)       | TAU (n=46)         | PoMeT vs. TAU               |
|----------------------------------------------------------------------------------|--------------------|--------------------|-----------------------------|
|                                                                                  | Mean (SD)          | Mean (SD)          | Diff 95% CI                 |
| <b>(A) Mental Health (MH) Inpatient Community, Outpatient and Inpatient Care</b> | <b>1603 (2253)</b> | <b>1127 (957)</b>  | <b>476 (-232 to 1184)</b>   |
| MH Community Care                                                                | 858 (854)          | 868 (879)          | -10 (-365 to 345)           |
| Drop-in Center <sup>c</sup>                                                      | 205 (509)          | 203 (532)          | 2 (-211 to 216)             |
| Community Psychiatrist                                                           | 5 (23)             | 5 (14)             | -0.2 (-8 to 8)              |
| Community Psychologist                                                           | 3 (19)             | 14 (56)            | -11 (-28 to 6)              |
| CPN                                                                              | 414 (411)          | 438 (443)          | -25 (-200 to 151)           |
| Self Help Group                                                                  | 222 (496)          | 202 (464)          | 20 (-177 to 216)            |
| Drug Alcohol Support                                                             | 10 (50)            | 6 (33)             | 4 (-13 to 22)               |
| MH Outpatient Care                                                               | 263 (266)          | 259 (209)          | 3 (-94 to 101)              |
| Outpatient Psychiatrist                                                          | 225 (199)          | 227 (149)          | -2 (-74 to 70)              |
| Outpatient Psychologist                                                          | 37 (177)           | 32 (151)           | 5 (-62 to 72)               |
| MH Inpatient Care                                                                | 482 (2164)         | 0                  | 482 (-146 to 1110)          |
| <b>B) Psychiatric medication</b>                                                 | <b>1359 (1338)</b> | <b>1197 (779)</b>  | <b>162 (-401 to 726)</b>    |
| <b>C) Intervention (PoMeT)</b>                                                   | <b>823 (354)</b>   | <b>0</b>           | <b>823 (721 to 927)</b>     |
| <b>MH Care: A+B+C</b>                                                            | <b>3785 (2785)</b> | <b>2324 (1861)</b> | <b>1461 (493 to 2429)*</b>  |
| <b>D) Non-Mental Health Care</b>                                                 | <b>758 (1180)</b>  | <b>811 (1187)</b>  | <b>-53 (-538 to 432)</b>    |
| Primary Care                                                                     | 175 (175)          | 162 (166)          | 13 (-56 to 83)              |
| General Practitioner (GP)                                                        | 150 (170)          | 143 (159)          | 7 (-60 to 75)               |
| GP Practice Nurse                                                                | 25 (38)            | 18 (30)            | 6 (-8 to 20)                |
| NMH Community Care                                                               | 218 (268)          | 277 (344)          | -59 (-186 to 68)            |
| Community District Nurse                                                         | 25 (119)           | 13 (57)            | 11 (-26 to 49)              |
| Occupational Therapy                                                             | 4 (15)             | 17 (54)            | -12 (-29 to 4)              |
| Physiotherapy                                                                    | 9 (45)             | 22 (77)            | -14 (-40 to 13)             |
| Emergency Services                                                               | 20 (79)            | 77 (185)           | -57 (-116 to 2)             |
| Alternative Care                                                                 | 0                  | 0                  | 0                           |
| Other Health Care                                                                | 161 (189)          | 148 (186)          | 12 (-64 to 89)              |
| NMH Out- and Daypatient Care                                                     | 163 (328)          | 184 (287)          | -20 (-146 to 106)           |
| Accident and Emergency                                                           | 41 (114)           | 48 (112)           | -7 (-53 to 40)              |
| NMH Outpatient                                                                   | 102 (245)          | 127 (248)          | -25 (-127 to 76)            |
| Daypatient                                                                       | 21 (123)           | 9 (43)             | 12 (-26 to 49)              |
| NMH Inpatient care                                                               | 201 (839)          | 188 (758)          | 12 (-315 to 340)            |
| <b>Health Care: A+B+C+D</b>                                                      | <b>4543 (2879)</b> | <b>3135 (2061)</b> | <b>1408 (378 to 2437)*</b>  |
| <b>E) Social Care</b>                                                            | <b>1118 (2438)</b> | <b>590 (1453)</b>  | <b>528 (-292 to 1348)</b>   |
| Social Worker                                                                    | 254 (522)          | 208 (473)          | 46 (-157 to 250)            |
| Home Helper                                                                      | 29 (181)           | 16 (93)            | 13 (-45 to 71)              |
| Housing Worker                                                                   | 31 (178)           | 21 (97)            | 10 (-48 to 69)              |
| Community Support Worker                                                         | 789 (2180)         | 334 (1110)         | 454 (-253 to 1162)          |
| Volunteer                                                                        | 15 (56)            | 11 (53)            | 4 (-18 to 27)               |
| <b>Health and Social Care: A+B+C+D+E</b>                                         | <b>5661 (3980)</b> | <b>3726 (2536)</b> | <b>1936 (572 to 3300)*</b>  |
| <b>F) Total Indirect Costs</b>                                                   | <b>2300 (4607)</b> | <b>2762 (5894)</b> | <b>-462 (-2638 to 1713)</b> |
| Lost Productivity (days)                                                         | 176 (1027)         | 95 (457)           | 81 (-244 to 406)            |
| Informal Care                                                                    | 2124 (4489)        | 2667 (5908)        | -543 (-2702 to 1616)        |
| <b>Societal: A+B+C+D+E+F</b>                                                     | <b>7961 (6601)</b> | <b>6487 (6712)</b> | <b>1474 (-1255 to 4202)</b> |

PoMeT: PoMeT intervention group, TAU: Treatment As Usual group, \*p<0.05, **bold: summary cost categories**

**Supplementary Table S6.** Sensitivity analysis: Cost-effectiveness of PoMeT vs. TAU adjusted for cost outliers.

| Perspective            | Cost difference<br>(95% CI)<br>PoMeT vs. TAU | QALY difference<br>(95% CI)<br>PoMeT vs. TAU | ICER<br>(95% CI)<br>PoMeT vs. TAU                   |
|------------------------|----------------------------------------------|----------------------------------------------|-----------------------------------------------------|
| Health and social care | £2,038*<br>(£677 to £3,339)                  | -0.0175<br>(-0.0535 to 0.0184)               | -£110,162/QALY<br>(-£900,048/QALY to £818,587/QALY) |
| Societal               | £1,310<br>(-£1325 to £3945)                  | -0.0178<br>(-0.0537 to 0.0182)               | -£74,857/QALY<br>(-£545,977/QALY to £588,983/QALY)  |

ICER: Incremental Cost-Effectiveness Ratio, QALYs: Quality-Adjusted Life Years, PoMeT: PoMeT intervention group, TAU: Treatment As Usual group, \*p<0.05

## Supplementary Figures

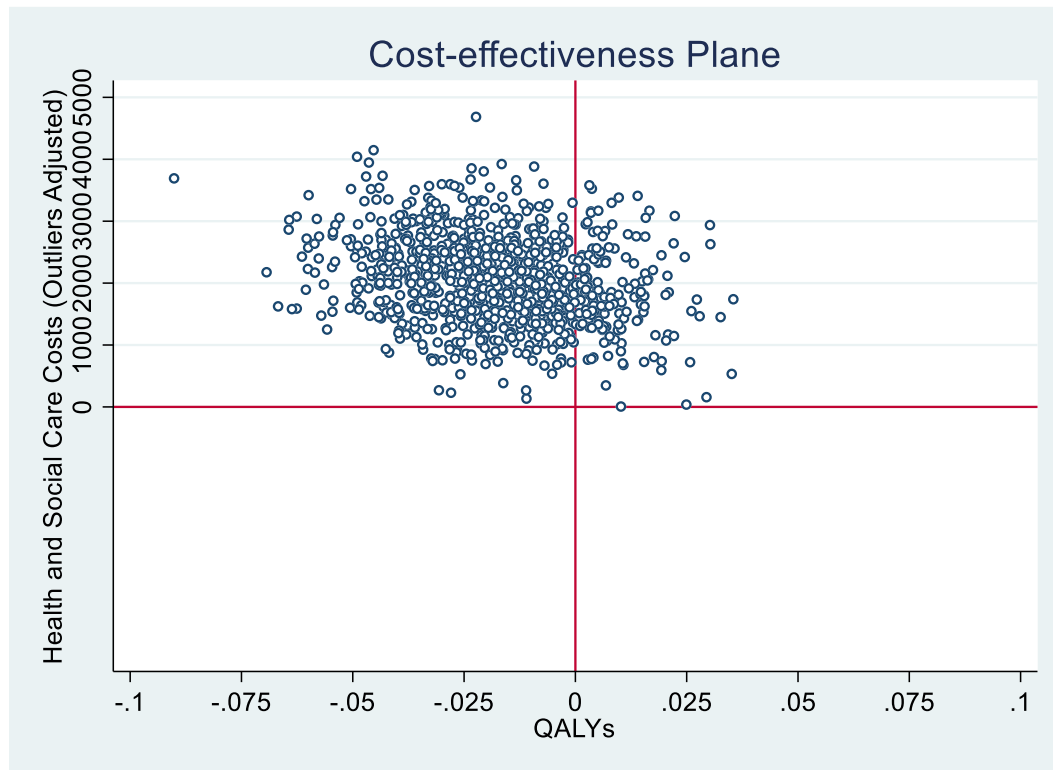

**Supplementary Figure S1.** Uncertainty in the cost-effectiveness results: bootstrapped ICERs (PoMeT vs. TAU) from the 'health and social care' perspective adjusted for cost outliers.

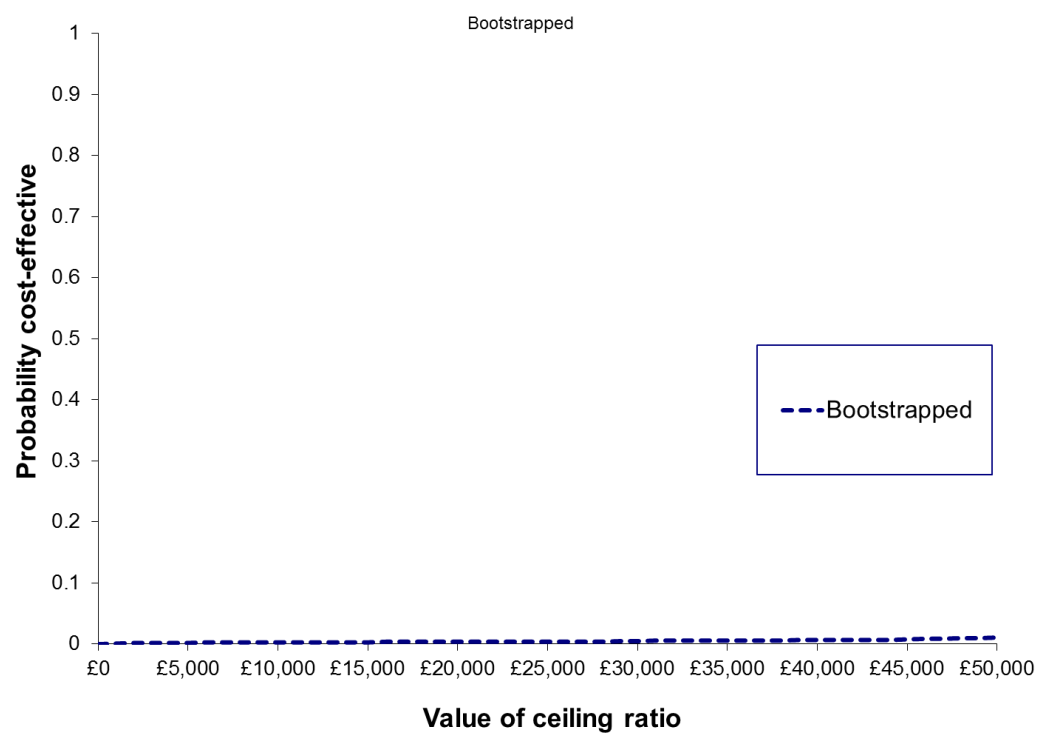

**Supplementary Figure S2.** Cost-Effectiveness Acceptability Curve (CEAC): Probability of PoMeT being cost-effective in comparison to TAU at different willingness-to-pay thresholds for QALY gained from the 'health and social care' perspective adjusted for cost outliers.
